# Supplementary material for: A Metabolomic Study of Epichloë Endophytes for Screening Antifungal Metabolites
Source: MDPI journal article supplement (doi:10.3390/metabo12010037), 2022-01-04
Supplement: s1 [file s1]

# Supplementary Materials: Bioprospecting *Epichloë* sp. Endophytes for the Discovery of Antifungal Metabolites

Krishni Fernando, Priyanka Reddy, Kathryn M. Guthridge, German C. Spangenberg, Simone J. Rochfort

**Supplementary Table S1:** Metabolites present in refined fractions extracted from NEA12 MS and NEA23 MS that are also present in the metabolomes of *in vitro* cultures (NEA12 ME and NEA23 ME).

| Name | Mass     | m/z      | RT    | Presence/absence in refined fractions |          | Presence in vitro (number of cultures) |       | Q-Value | Directed effect size (NEA23 ME: NEA12 ME) |
|------|----------|----------|-------|---------------------------------------|----------|----------------------------------------|-------|---------|-------------------------------------------|
|      |          |          |       | NEA23 RF                              | NEA12 RF | NEA23                                  | NEA12 |         |                                           |
| M1   | 242.0412 | 243.0485 | 2.91  | +                                     | -        | 0                                      | 0     | NA      | NA                                        |
| M2   | 255.2558 | 256.2631 | 11.19 | +                                     | -        | 28                                     | 27    | 0.048   | NA                                        |
| M3   | 364.1280 | 365.1353 | 9.14  | +                                     | +        | 28                                     | 27    | <0.001  | 1.20                                      |
| M4   | 365.3625 | 366.3697 | 12.95 | +                                     | -        | 28                                     | 27    | <0.001  | 1:1.18                                    |
| M5   | 365.3652 | 366.3725 | 12.84 | +                                     | -        | 28                                     | 27    | <0.001  | 1:9.67                                    |
| M6   | 365.3682 | 366.3755 | 12.95 | +                                     | -        | 28                                     | 27    | <0.001  | 1:1.2                                     |
| M7   | 367.4173 | 368.4245 | 13.50 | +                                     | -        | 28                                     | 27    | 0.046   | NA                                        |
| M8   | 407.3153 | 408.3226 | 8.36  | -                                     | +        | 3                                      | 12    | 0.171   | NA                                        |
| M9   | 426.2376 | 427.2449 | 10.80 | +                                     | -        | 28                                     | 27    | <0.001  | 1:1.97                                    |
| M10  | 426.2375 | 427.2448 | 10.90 | +                                     | -        | 28                                     | 27    | 0.001   | 1:1.23                                    |
| M11  | 452.3370 | 453.3442 | 8.61  | -                                     | +        | 28                                     | 27    | 0.206   | NA                                        |
| M12  | 452.3344 | 453.3417 | 8.70  | -                                     | +        | 28                                     | 27    | <0.001  | 1.82                                      |
| M13  | 452.3341 | 453.3414 | 8.72  | -                                     | +        | 28                                     | 27    | <0.001  | 2.57                                      |
| M14  | 457.3394 | 458.3467 | 9.92  | +                                     | -        | 28                                     | 27    | 0.145   | NA                                        |
| M15  | 462.2965 | 463.3038 | 9.83  | +                                     | -        | 28                                     | 27    | <0.001  | 1:2.53                                    |
| M16  | 466.3496 | 467.3569 | 9.25  | -                                     | +        | 22                                     | 27    | 0.037   | NA                                        |
| M17  | 483.3763 | 484.3835 | 9.24  | +                                     | +        | 28                                     | 27    | <0.001  | 1:3.48                                    |
| M18  | 496.3602 | 497.3674 | 8.71  | +                                     | +        | 0                                      | 8     | NA      | NA                                        |
| M19  | 527.4024 | 528.4096 | 9.24  | +                                     | +        | 28                                     | 27    | <0.001  | 1:3.53                                    |
| M20  | 532.3574 | 533.3647 | 9.24  | +                                     | +        | 28                                     | 27    | <0.001  | 1:3.56                                    |
| M21  | 546.3005 | 547.3077 | 11.85 | +                                     | -        | 28                                     | 27    | <0.001  | 1:1.10                                    |
| M22  | 571.4285 | 572.4358 | 9.24  | +                                     | +        | 27                                     | 27    | 0.006   | 1:3.74                                    |
| M23  | 576.3837 | 577.3909 | 9.23  | +                                     | +        | 28                                     | 27    | <0.001  | 1:4.12                                    |
| M24  | 589.4180 | 590.4253 | 9.89  | +                                     | -        | 28                                     | 27    | <0.001  | 1:1.08                                    |
| M25  | 590.4236 | 591.4308 | 11.79 | +                                     | -        | 0                                      | 2     | NA      | NA                                        |
| M26  | 594.3594 | 595.3666 | 9.82  | +                                     | -        | 28                                     | 27    | <0.001  | 1:1.61                                    |
| M27  | 594.3744 | 595.3817 | 9.90  | +                                     | -        | 28                                     | 27    | 0.212   | NA                                        |
| M28  | 607.4645 | 608.4718 | 11.83 | +                                     | -        | 6                                      | 12    | 0.775   | NA                                        |
| M29  | 615.4546 | 616.4618 | 9.24  | +                                     | +        | 27                                     | 27    | <0.001  | 1:4.60                                    |
| M30  | 620.4100 | 621.4173 | 9.24  | +                                     | +        | 27                                     | 27    | <0.001  | 1:4.28                                    |
| M31  | 634.4644 | 635.4717 | 11.85 | +                                     | -        | 15                                     | 24    | 0.309   | NA                                        |
| M32  | 651.4907 | 652.4980 | 11.85 | +                                     | -        | 13                                     | 13    | 0.951   | NA                                        |
| M33  | 662.4203 | 663.4276 | 9.80  | +                                     | -        | 28                                     | 27    | <0.001  | 1.07                                      |
| M34  | 662.4171 | 663.4243 | 14.30 | +                                     | +        | 28                                     | 27    | <0.001  | 1:2.30                                    |
| M35  | 662.4447 | 663.4520 | 14.38 | +                                     | +        | 28                                     | 27    | 0.021   | NA                                        |
| M36  | 663.4473 | 664.4546 | 14.33 | +                                     | +        | 28                                     | 27    | <0.001  | 1:1.92                                    |
| M37  | 678.3797 | 679.3869 | 11.94 | +                                     | -        | 28                                     | 27    | 0.717   | NA                                        |
| M38  | 678.4871 | 679.4944 | 11.95 | +                                     | -        | 0                                      | 0     | NA      | NA                                        |

|     |          |          |       |   |   |    |    |        |        |
|-----|----------|----------|-------|---|---|----|----|--------|--------|
| M39 | 684.4323 | 685.4395 | 14.23 | - | + | 1  | 10 | 0.659  | NA     |
| M40 | 684.4297 | 685.4369 | 14.53 | - | + | 28 | 27 | <0.001 | 1.42   |
| M41 | 684.4313 | 685.4385 | 14.58 | - | + | 28 | 27 | <0.001 | 1.47   |
| M42 | 685.4159 | 686.4232 | 14.29 | - | + | 28 | 27 | <0.001 | 1:1.72 |
| M43 | 695.5170 | 696.5243 | 11.87 | + | - | 1  | 2  | NA     | NA     |
| M44 | 695.5172 | 696.5245 | 11.96 | + | - | 0  | 0  | NA     | NA     |
| M45 | 721.4687 | 722.4759 | 11.97 | + | - | 25 | 27 | <0.001 | 1:3.10 |
| M46 | 762.5085 | 763.5158 | 14.59 | - | + | 28 | 27 | 0.089  | NA     |
| M47 | 762.5091 | 763.5164 | 14.68 | - | + | 28 | 27 | 0.030  | NA     |
| M48 | 762.5095 | 763.5168 | 14.74 | - | + | 28 | 27 | 0.003  | 1:1.13 |
| M49 | 762.5071 | 763.5144 | 14.38 | + | + | 28 | 27 | 0.065  | NA     |
| M50 | 762.5090 | 763.5163 | 14.54 | - | + | 28 | 27 | 0.090  | NA     |
| M51 | 763.4952 | 764.5024 | 14.64 | - | + | 28 | 27 | 0.330  | NA     |
| M52 | 763.5110 | 764.5182 | 14.42 | + | + | 28 | 27 | 0.387  | NA     |
| M53 | 763.5109 | 764.5182 | 14.33 | + | + | 28 | 27 | <0.001 | 1:1.93 |
| M54 | 787.5037 | 788.5109 | 12.10 | + | - | 0  | 0  | NA     | NA     |
| M55 | 788.5186 | 789.5259 | 11.90 | + | - | 3  | 0  | NA     | NA     |
| M56 | 788.5210 | 789.5283 | 11.94 | + | - | 3  | 0  | NA     | NA     |
| M57 | 802.5324 | 803.5397 | 12.41 | + | - | 28 | 27 | <0.001 | 1.71   |
| M58 | 802.5319 | 803.5392 | 12.46 | + | - | 28 | 27 | <0.001 | 1.72   |
| M59 | 802.5335 | 803.5408 | 12.26 | + | - | 28 | 27 | <0.001 | 1.33   |
| M60 | 802.5342 | 803.5415 | 12.33 | + | - | 28 | 27 | <0.001 | 2.01   |
| M61 | 858.5970 | 859.6043 | 12.59 | + | - | 24 | 7  | <0.001 | 5.91   |
| M62 | 338.2356 | 339.2429 | 3.69  | - | + | 28 | 27 | <0.001 | 1:2.54 |
| M63 | 361.2333 | 362.2406 | 3.88  | + | + | 24 | 27 | <0.001 | 1:2.41 |
| M64 | 510.3759 | 511.3832 | 9.25  | - | + | 1  | 27 | NA     | NA     |
| M65 | 540.3863 | 541.3936 | 8.71  | + | + | 0  | 7  | NA     | NA     |
| M66 | 554.4020 | 555.4093 | 9.25  | - | + | 0  | 26 | NA     | NA     |
| M67 | 858.5974 | 859.6047 | 12.81 | + | - | 19 | 8  | 0.926  | NA     |

[illegible]

|     |          |          |       |   |   |   |   |   |   |   |   |   |   |
|-----|----------|----------|-------|---|---|---|---|---|---|---|---|---|---|
| M15 | 462.2965 | 463.3038 | 9.83  | - | - | - | - | - | - | - | - | + | + |
| M16 | 466.3496 | 467.3569 | 9.25  | - | - | - | + | - | - | - | - | - | - |
| M17 | 483.3763 | 484.3835 | 9.24  | - | - | - | + | - | - | - | - | - | + |
| M18 | 496.3602 | 497.3674 | 8.71  | - | - | - | + | - | - | - | - | - | + |
| M19 | 527.4024 | 528.4096 | 9.24  | - | - | - | + | - | - | - | - | - | + |
| M20 | 532.3574 | 533.3647 | 9.24  | - | - | - | + | - | - | - | - | - | + |
| M21 | 546.3005 | 547.3077 | 11.85 | - | - | - | - | - | - | - | + | - | - |
| M22 | 571.4285 | 572.4358 | 9.24  | - | - | - | + | - | - | - | - | - | + |
| M23 | 576.3837 | 577.3909 | 9.23  | - | - | - | + | - | - | - | - | - | + |
| M24 | 589.4180 | 590.4253 | 9.89  | - | - | - | - | - | - | - | + | + | - |
| M25 | 590.4236 | 591.4308 | 11.79 | - | - | - | - | - | - | - | + | - | - |
| M26 | 594.3594 | 595.3666 | 9.82  | - | - | - | - | - | - | - | - | + | - |
| M27 | 594.3744 | 595.3817 | 9.90  | - | - | - | - | - | - | - | - | + | - |
| M28 | 607.4645 | 608.4718 | 11.83 | - | - | - | - | - | - | - | + | - | - |
| M29 | 615.4546 | 616.4618 | 9.24  | - | - | - | + | - | - | - | - | - | + |
| M30 | 620.4100 | 621.4173 | 9.24  | - | - | - | + | - | - | - | - | - | + |
| M31 | 634.4644 | 635.4717 | 11.85 | - | - | - | - | - | - | - | + | - | - |
| M32 | 651.4907 | 652.4980 | 11.85 | - | - | - | - | - | - | - | + | - | - |
| M33 | 662.4203 | 663.4276 | 9.80  | - | - | - | - | - | - | - | - | + | - |
| M34 | 662.4171 | 663.4243 | 14.30 | - | - | + | - | + | + | + | - | + | - |
| M35 | 662.4447 | 663.4520 | 14.38 | - | - | + | - | + | + | + | - | + | - |
| M36 | 663.4473 | 664.4546 | 14.33 | - | - | + | - | + | + | + | - | + | - |
| M37 | 678.3797 | 679.3869 | 11.94 | - | - | - | - | - | - | - | + | - | - |
| M38 | 678.4871 | 679.4944 | 11.95 | - | - | - | - | - | - | - | + | - | - |
| M39 | 684.4323 | 685.4395 | 14.23 | - | - | - | - | + | + | - | - | - | - |
| M40 | 684.4297 | 685.4369 | 14.53 | - | - | + | - | + | + | + | - | - | - |
| M41 | 684.4313 | 685.4385 | 14.58 | - | - | - | - | - | + | + | - | - | - |
| M42 | 685.4159 | 686.4232 | 14.29 | - | - | - | - | + | - | - | - | - | - |
| M43 | 695.5170 | 696.5243 | 11.87 | - | - | - | - | - | - | - | + | - | - |
| M44 | 695.5172 | 696.5245 | 11.96 | - | - | - | - | - | - | - | + | - | - |
| M45 | 721.4687 | 722.4759 | 11.97 | - | - | - | - | - | - | - | + | - | - |
| M46 | 762.5085 | 763.5158 | 14.59 | - | - | - | - | + | + | + | - | - | - |
| M47 | 762.5091 | 763.5164 | 14.68 | - | - | - | - | - | - | + | - | - | - |
| M48 | 762.5095 | 763.5168 | 14.74 | - | - | - | - | - | - | + | - | - | - |
| M49 | 762.5071 | 763.5144 | 14.38 | - | - | + | - | + | + | + | - | + | - |
| M50 | 762.5090 | 763.5163 | 14.54 | - | - | + | - | + | + | + | - | - | - |
| M51 | 763.4952 | 764.5024 | 14.64 | - | - | - | - | - | - | + | - | - | - |
| M52 | 763.5110 | 764.5182 | 14.42 | - | - | + | - | + | + | + | - | + | - |
| M53 | 763.5109 | 764.5182 | 14.33 | - | - | + | - | + | + | + | - | + | - |
| M54 | 787.5037 | 788.5109 | 12.10 | - | - | - | - | - | - | - | + | - | - |
| M55 | 788.5186 | 789.5259 | 11.90 | - | - | - | - | - | - | - | + | - | - |
| M56 | 788.5210 | 789.5283 | 11.94 | - | - | - | - | - | - | - | + | - | - |
| M57 | 802.5324 | 803.5397 | 12.41 | - | - | - | - | - | - | - | + | + | - |
| M58 | 802.5319 | 803.5392 | 12.46 | - | - | - | - | - | - | - | + | + | - |
| M59 | 802.5335 | 803.5408 | 12.26 | - | - | - | - | - | - | - | + | + | - |
| M60 | 802.5342 | 803.5415 | 12.33 | - | - | - | - | - | - | - | + | + | - |
| M61 | 858.5970 | 859.6043 | 12.59 | - | - | - | - | - | - | - | + | + | - |
| M62 | 338.2356 | 339.2429 | 3.69  | - | - | - | - | - | - | - | - | - | + |
| M63 | 361.2333 | 362.2406 | 3.88  | - | - | - | - | - | - | - | + | + | - |

|     |          |          |       |   |   |   |   |   |   |   |   |   |   |
|-----|----------|----------|-------|---|---|---|---|---|---|---|---|---|---|
| M64 | 510.3759 | 511.3832 | 9.25  | - | - | - | + | - | - | - | + | + | - |
| M65 | 540.3863 | 541.3936 | 8.71  | - | - | - | - | - | - | - | - | + | - |
| M66 | 554.4020 | 555.4093 | 9.25  | - | - | - | - | - | - | - | - | + | - |
| M67 | 858.5974 | 859.6047 | 12.81 | - | - | - | - | - | - | - | - | + | - |

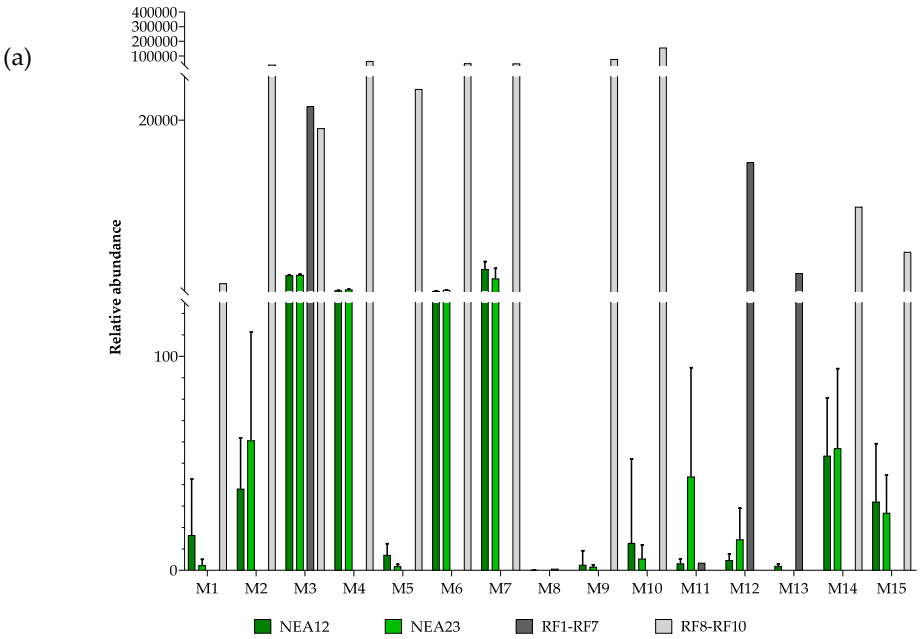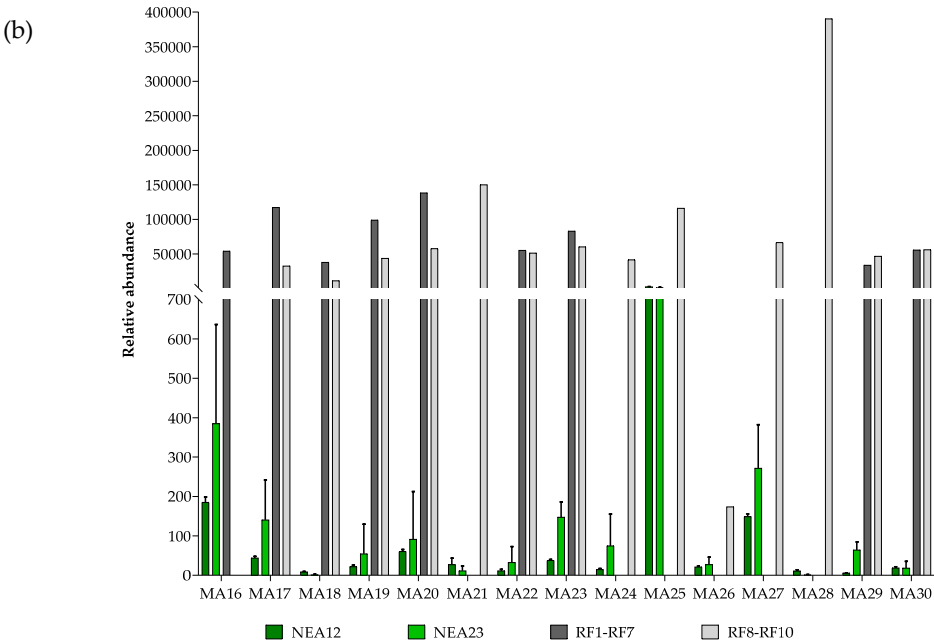

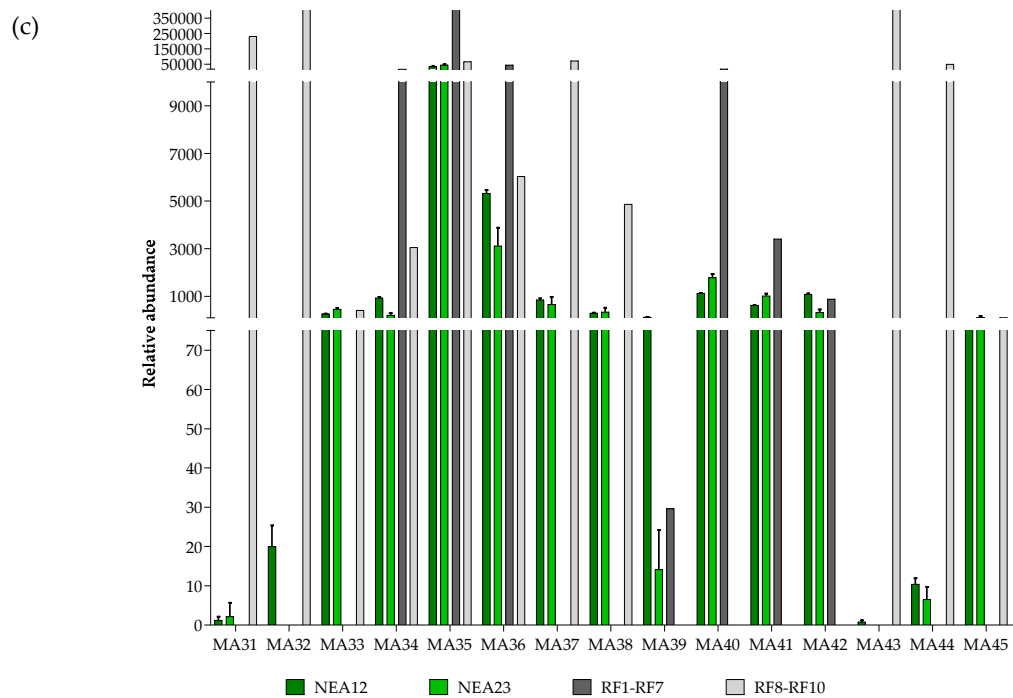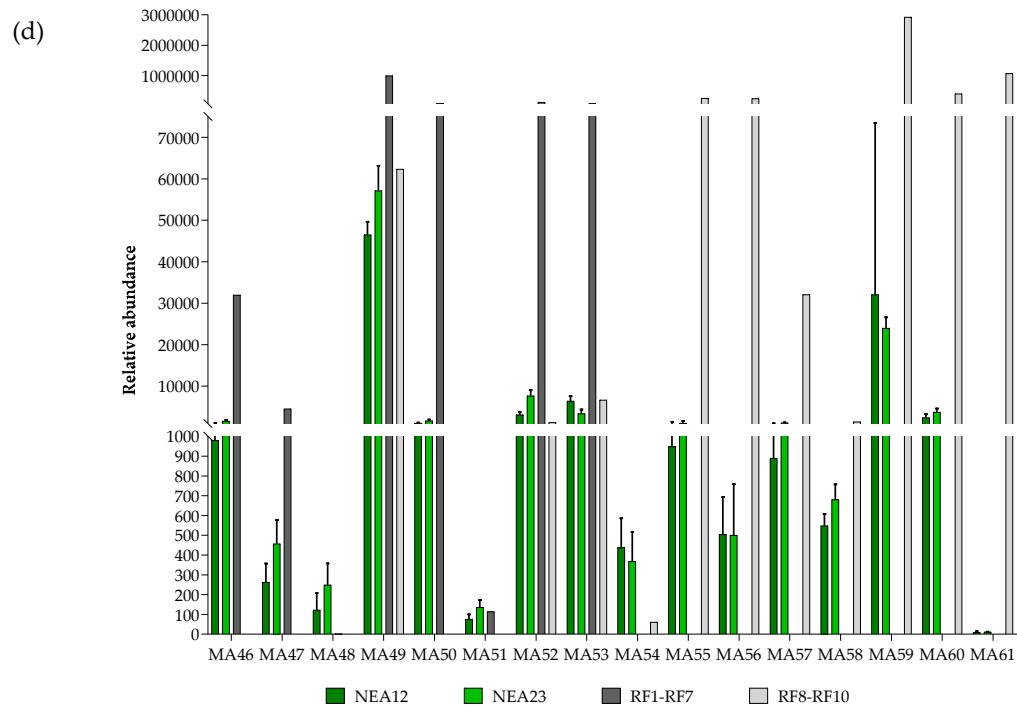

**Supplementary Figure S1:** Relative abundance of metabolites (a) M1-M15, (b) M16-M30, (c) M31-M45 and (d) M46-M61 present in NEA12 (NEA12 PE,  $n=48$ ) and NEA23 (NEA23 PE,  $n=30$ ) plant extract metabolomes and in refined bioactive fractions of NEA12 (RF1-RF7) and NEA23 (RF8-RF10). Error bars represent + standard error.

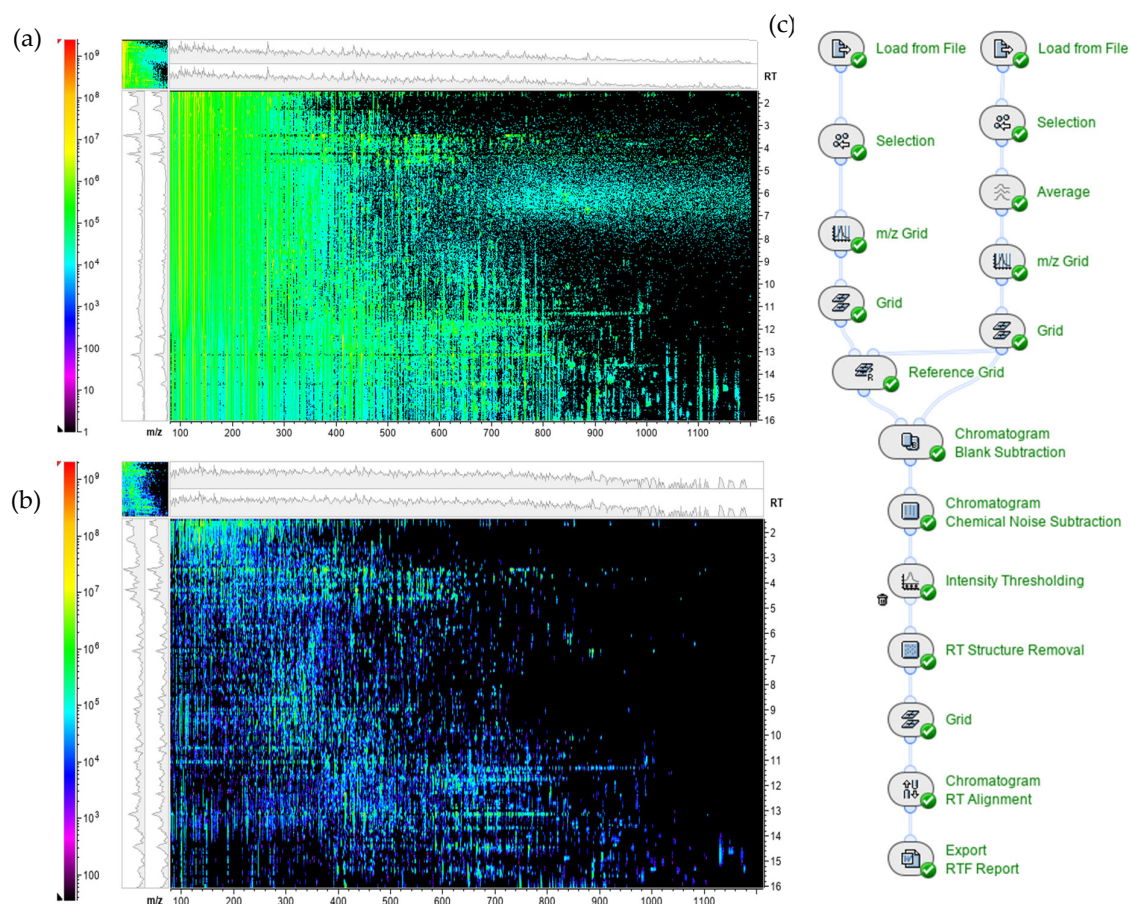

**Supplementary Figure S2:** LCMS data imported to Refiner MS and processed for data refining using suitable parameters (a) Positive ion data of plant extracts, (b) Processed plant extract data after blank subtraction, chromatogram noise subtraction, intensity thresholding, RT structure removal and chromatogram RT alignment, (c) Workflow for data processing

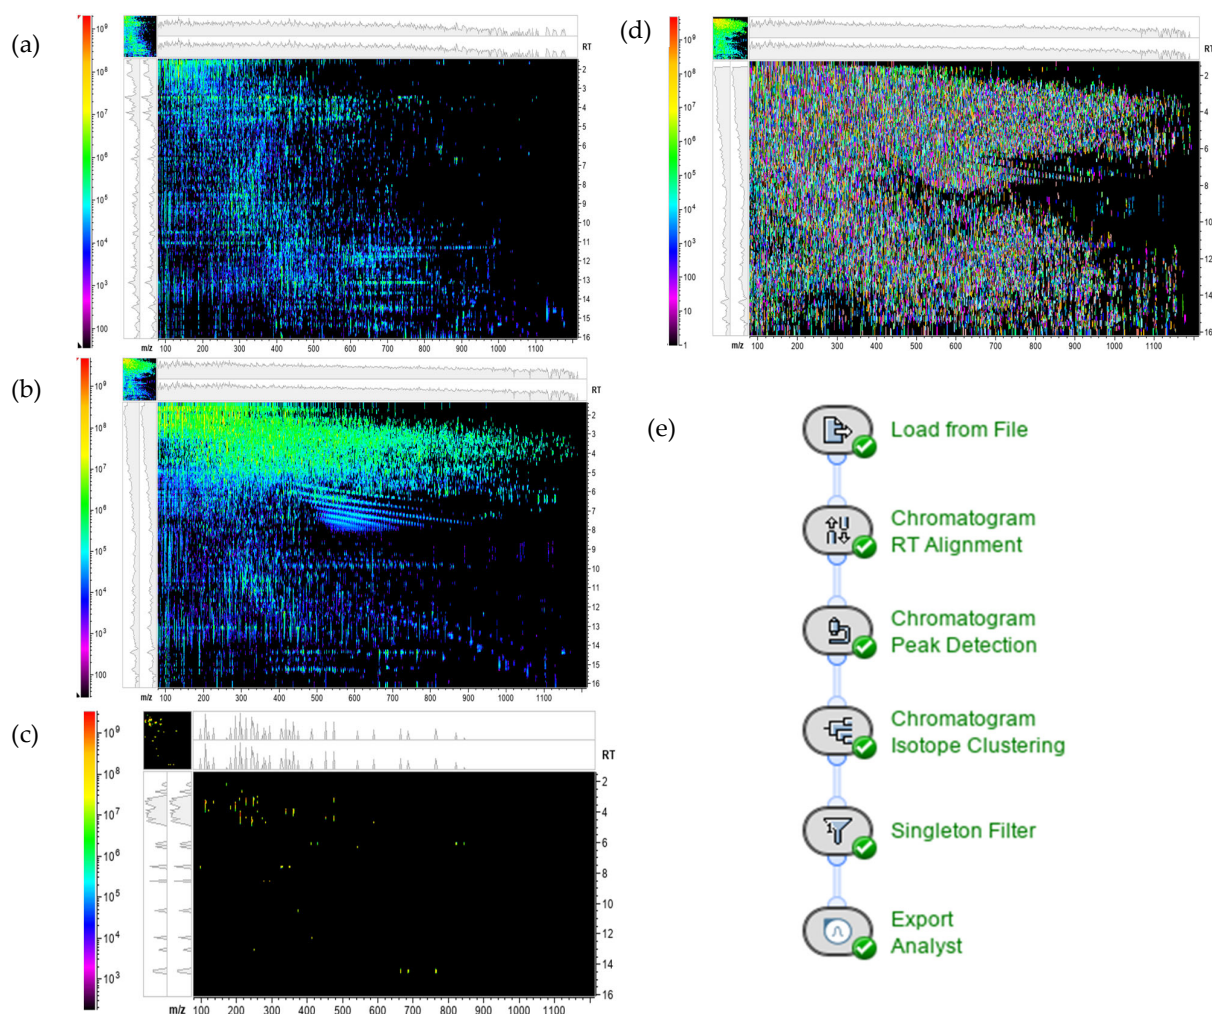

**Supplementary Figure S3:** Refined data imported from (a) Plant extracts, (b) Media supernatant extracts, (c) Refined fractions to be annotated together in Refiner MS, (d) Annotated data after chromatogram RT alignment, chromatogram peak detection, chromatogram isotope clustering followed by singleton filter and (e) Workflow for data processing
